# Supplementary material for: The Impact of Universal Credit on Mental, Physical, and Financial Well-Being: Longitudinal Evidence from the UK Household Longitudinal Survey
Source: Research Square preprint supplement (doi:10.21203/rs.3.rs-7882810/v1), 2025-12-23
Supplement: Supplementary file 1 [file d5be94b39583be77b02b0d85.docx]

**Supplementary files**

**Title: The Impact of Universal Credit on Mental, Physical, and Financial Well-Being: Longitudinal Evidence from the UK Household Longitudinal Survey**

**Table S1**  Event study results showing dynamic effects for average treatment effects on the treated (ATT) over time (with time=0 at the time of transition to universal credit)

| Periods to Treatment | ATT | 95% CIs | | p-value |
| --- | --- | --- | --- | --- |
| (a) GHQ | | | | |
| T-7 | 1.203 | -0.984 | 3.389 | 0.281 |
| T-6 | 0.271 | -1.338 | 1.880 | 0.742 |
| T-5 | -1.140 | -2.420 | 0.140 | 0.081 |
| T-4 | -0.285 | -1.252 | 0.683 | 0.564 |
| T-3 | 0.158 | -0.771 | 1.086 | 0.740 |
| T-2 | -0.546 | -1.354 | 0.261 | 0.185 |
| T-1 | 0.805 | -0.008 | 1.618 | 0.052 |
| T0 | 1.045 | 0.348 | 1.742 | 0.003 |
| T+1 | 0.641 | -0.279 | 1.560 | 0.172 |
| T+2 | 0.177 | -0.937 | 1.290 | 0.756 |
| T+3 | 0.561 | -0.848 | 1.970 | 0.435 |
| T+4 | 2.874 | 0.643 | 5.105 | 0.012 |
| T+5 | 3.296 | 0.937 | 5.656 | 0.006 |
| T+6 | 5.021 | 1.288 | 8.754 | 0.008 |
| T+7 | 3.848 | -0.423 | 8.119 | 0.077 |
| (b) SF-12 MCS | | | | |
| T-7 | -4.490 | -7.959 | -1.022 | 0.011 |
| T-6 | 0.151 | -2.247 | 2.550 | 0.902 |
| T-5 | 0.960 | -1.191 | 3.111 | 0.382 |
| T-4 | -0.165 | -1.859 | 1.528 | 0.848 |
| T-3 | -0.848 | -2.178 | 0.482 | 0.211 |
| T-2 | 0.059 | -1.584 | 1.702 | 0.944 |
| T-1 | -0.374 | -1.827 | 1.078 | 0.613 |
| T0 | -1.474 | -2.804 | -0.145 | 0.030 |
| T+1 | -1.001 | -2.518 | 0.516 | 0.196 |
| T+2 | -0.881 | -2.909 | 1.146 | 0.394 |
| T+3 | -1.642 | -3.891 | 0.607 | 0.152 |
| T+4 | -4.706 | -8.394 | -1.018 | 0.012 |
| T+5 | -6.382 | -10.477 | -2.288 | 0.002 |
| T+6 | -9.111 | -14.480 | -3.741 | 0.001 |
| T+7 | -9.317 | -22.297 | 3.663 | 0.159 |
| (c) SF-12 PCS | | | | |
| T-7 | 0.001 | -2.413 | 2.414 | 1.000 |
| T-6 | -0.538 | -2.823 | 1.747 | 0.645 |
| T-5 | -0.091 | -2.178 | 1.996 | 0.932 |
| T-4 | 0.083 | -1.328 | 1.494 | 0.908 |
| T-3 | -0.700 | -1.795 | 0.395 | 0.210 |
| T-2 | 0.492 | -0.559 | 1.544 | 0.359 |
| T-1 | -0.219 | -1.264 | 0.826 | 0.681 |
| T0 | 0.010 | -0.994 | 1.013 | 0.985 |
| T+1 | -0.712 | -2.015 | 0.591 | 0.284 |
| T+2 | -0.456 | -2.025 | 1.112 | 0.569 |
| T+3 | -1.974 | -3.991 | 0.043 | 0.055 |
| T+4 | -1.587 | -4.553 | 1.379 | 0.294 |
| T+5 | -0.680 | -3.946 | 2.587 | 0.683 |
| T+6 | -3.272 | -7.249 | 0.705 | 0.107 |
| T+7 | -4.995 | -11.303 | 1.313 | 0.121 |
| (d) Unemployment | | | | |
| T-7 | 0.013 | -0.129 | 0.156 | 0.855 |
| T-6 | 0.100 | 0.006 | 0.193 | 0.037 |
| T-5 | -0.043 | -0.120 | 0.034 | 0.273 |
| T-4 | -0.021 | -0.085 | 0.044 | 0.534 |
| T-3 | 0.023 | -0.023 | 0.068 | 0.332 |
| T-2 | 0.008 | -0.043 | 0.059 | 0.760 |
| T-1 | -0.002 | -0.049 | 0.045 | 0.937 |
| T0 | 0.054 | 0.008 | 0.101 | 0.023 |
| T+1 | 0.020 | -0.038 | 0.079 | 0.490 |
| T+2 | -0.016 | -0.084 | 0.051 | 0.635 |
| T+3 | -0.053 | -0.139 | 0.033 | 0.230 |
| T+4 | -0.059 | -0.153 | 0.034 | 0.213 |
| T+5 | 0.008 | -0.146 | 0.161 | 0.923 |
| T+6 | -0.014 | -0.128 | 0.100 | 0.805 |
| T+7 | 0.043 | -0.246 | 0.332 | 0.771 |
| (e) Better future financial situation | | | | |
| T-7 | 0.028 | -0.131 | 0.186 | 0.731 |
| T-6 | 0.035 | -0.105 | 0.176 | 0.622 |
| T-5 | -0.026 | -0.110 | 0.059 | 0.550 |
| T-4 | -0.026 | -0.106 | 0.054 | 0.524 |
| T-3 | -0.006 | -0.084 | 0.072 | 0.880 |
| T-2 | -0.024 | -0.088 | 0.040 | 0.468 |
| T-1 | 0.041 | -0.025 | 0.106 | 0.221 |
| T0 | -0.034 | -0.094 | 0.026 | 0.273 |
| T+1 | -0.055 | -0.134 | 0.023 | 0.166 |
| T+2 | -0.129 | -0.224 | -0.035 | 0.007 |
| T+3 | -0.128 | -0.223 | -0.032 | 0.009 |
| T+4 | -0.113 | -0.254 | 0.029 | 0.118 |
| T+5 | -0.076 | -0.221 | 0.069 | 0.306 |
| T+6 | -0.154 | -0.371 | 0.064 | 0.166 |
| T+7 | -0.179 | -0.494 | 0.135 | 0.264 |
| (f) Monthly benefit income | | | | |
| T-7 | 29.224 | -104.418 | 162.866 | 0.668 |
| T-6 | -66.281 | -232.315 | 99.753 | 0.434 |
| T-5 | -27.594 | -136.989 | 81.800 | 0.621 |
| T-4 | 110.907 | 23.680 | 198.135 | 0.013 |
| T-3 | -39.895 | -128.528 | 48.737 | 0.378 |
| T-2 | 32.774 | -57.140 | 122.687 | 0.475 |
| T-1 | -27.501 | -102.580 | 47.578 | 0.473 |
| T0 | -4.466 | -85.126 | 76.194 | 0.914 |
| T+1 | -49.961 | -153.019 | 53.096 | 0.342 |
| T+2 | -12.819 | -145.610 | 119.972 | 0.850 |
| T+3 | -166.573 | -298.471 | -34.675 | 0.013 |
| T+4 | -197.155 | -381.780 | -12.529 | 0.036 |
| T+5 | -369.759 | -569.073 | -170.445 | 0.000 |
| T+6 | -408.593 | -689.336 | -127.849 | 0.004 |
| T+7 | -665.462 | -1186.841 | -144.084 | 0.012 |
| (g) Monthly total net income | | | | |
| T-7 | 131.732 | -153.143 | 416.606 | 0.365 |
| T-6 | -17.995 | -369.227 | 333.236 | 0.920 |
| T-5 | -4.259 | -171.735 | 163.216 | 0.960 |
| T-4 | -0.871 | -141.070 | 139.327 | 0.990 |
| T-3 | -74.543 | -195.643 | 46.558 | 0.228 |
| T-2 | 264.243 | -352.120 | 880.605 | 0.401 |
| T-1 | -229.673 | -812.595 | 353.249 | 0.440 |
| T0 | -60.477 | -307.365 | 186.411 | 0.631 |
| T+1 | -111.699 | -373.392 | 149.993 | 0.403 |
| T+2 | -372.198 | -670.734 | -73.662 | 0.015 |
| T+3 | -428.759 | -834.426 | -23.091 | 0.038 |
| T+4 | -195.080 | -1089.253 | 699.094 | 0.669 |
| T+5 | 46.384 | -1871.022 | 1963.791 | 0.962 |
| T+6 | -1256.813 | -2204.285 | -309.342 | 0.009 |
| T+7 | -1005.292 | -1842.533 | -168.051 | 0.019 |

Notes: Adjusted for age, sex, education, ethnicity, income, household size, whether to have a child, marital status, and region of residence; *for p<0.05, ** for p<0.01.

Table S2 Estimates from CSDID estimating the treatment effect of transitioning to Universal Credit (Not yet treated as the control group)

|  | GHQ | | | | SF-12 MCS | | | | SF-12 PCS | | | |
| --- | --- | --- | --- | --- | --- | --- | --- | --- | --- | --- | --- | --- |
|  | Coef. | 95% CIs | | p-value | Coef. | 95% CIs | | p-value | Coef. | 95% CIs | | p-value |
| Aggregate ATT | 1.148 | 0.266 | 2.030 | 0.011 | -2.034 | -3.655 | -0.413 | 0.014 | -0.819 | -1.992 | 0.354 | 0.171 |
| Event Study: Dynamic effects | | | | | | | | | | | | |
| T-7 | 1.203 | -0.984 | 3.389 | 0.281 | -4.490 | -7.959 | -1.022 | 0.011 | 0.001 | -2.413 | 2.414 | 1.000 |
| T-6 | 0.237 | -1.390 | 1.863 | 0.776 | 0.305 | -2.090 | 2.699 | 0.803 | -0.583 | -2.877 | 1.712 | 0.619 |
| T-5 | -1.164 | -2.500 | 0.171 | 0.087 | 1.003 | -1.229 | 3.234 | 0.379 | -0.096 | -2.215 | 2.022 | 0.929 |
| T-4 | -0.261 | -1.242 | 0.721 | 0.603 | -0.134 | -1.838 | 1.570 | 0.877 | 0.148 | -1.284 | 1.581 | 0.839 |
| T-3 | 0.167 | -0.776 | 1.111 | 0.728 | -0.775 | -2.116 | 0.567 | 0.258 | -0.753 | -1.864 | 0.358 | 0.184 |
| T-2 | -0.502 | -1.323 | 0.318 | 0.230 | 0.100 | -1.570 | 1.770 | 0.907 | 0.572 | -0.494 | 1.639 | 0.293 |
| T-1 | 0.833 | 0.018 | 1.648 | 0.045 | -0.268 | -1.727 | 1.192 | 0.719 | -0.238 | -1.306 | 0.830 | 0.662 |
| T0 | 1.013 | 0.306 | 1.721 | 0.005 | -1.406 | -2.784 | -0.028 | 0.045 | -0.013 | -1.049 | 1.024 | 0.981 |
| T+1 | 0.624 | -0.306 | 1.554 | 0.189 | -0.908 | -2.429 | 0.612 | 0.242 | -0.719 | -2.025 | 0.588 | 0.281 |
| T+2 | 0.082 | -1.046 | 1.210 | 0.886 | -0.544 | -2.568 | 1.480 | 0.598 | -0.417 | -1.992 | 1.159 | 0.604 |
| T+3 | 0.414 | -1.005 | 1.833 | 0.567 | -1.253 | -3.489 | 0.983 | 0.272 | -2.174 | -4.191 | -0.158 | 0.035 |
| T+4 | 2.919 | 0.721 | 5.116 | 0.009 | -4.658 | -8.322 | -0.994 | 0.013 | -1.616 | -4.591 | 1.360 | 0.287 |
| T+5 | 3.250 | 0.882 | 5.619 | 0.007 | -6.325 | -10.431 | -2.219 | 0.003 | -0.676 | -3.946 | 2.594 | 0.685 |
| T+6 | 4.992 | 1.209 | 8.775 | 0.010 | -9.069 | -14.409 | -3.729 | 0.001 | -3.211 | -7.183 | 0.762 | 0.113 |
| T+7 | 3.848 | -0.423 | 8.119 | 0.077 | -9.317 | -22.297 | 3.663 | 0.159 | -4.995 | -11.303 | 1.313 | 0.121 |

Table S3 Aggregate average treatment effects on the treated (ATT) from CSDID, estimating the treatment effect of transitioning to Universal Credit (excluding discontinued participation)

|  | Aggregate ATT | 95% CIs | | p-value |
| --- | --- | --- | --- | --- |
| GHQ | 1.001 | 0.027 | 1.974 | 0.044 |
| SF-12 MCS | -1.872 | -3.766 | 0.022 | 0.053 |
| SF-12 PCS | -0.698 | -2.207 | 0.810 | 0.364 |

Table S4 Aggregate average treatment effects on the treated (ATT) from CSDID, estimating the treatment effect of transitioning to Universal Credit (binary outcomes)

|  | Aggregate ATT | 95% CIs | | p-value |
| --- | --- | --- | --- | --- |
| Distress | 0.086 | 0.036 | 0.135 | 0.001 |
| Depression | 0.059 | -0.012 | 0.130 | 0.101 |
| Physical condition | 0.004 | -0.053 | 0.061 | 0.880 |

Table S5 Aggregate average treatment effects on the treated (ATT) from CSDID, estimating the treatment effect of transitioning to Universal Credit (sex-stratified analysis)

|  | Aggregate ATT | 95% CIs | | p-value |
| --- | --- | --- | --- | --- |
| Men | | | | |
| GHQ | 1.395 | -0.819 | 3.609 | 0.217 |
| SF-12 MCS | -4.696 | -8.771 | -0.621 | 0.024 |
| SF-12 PCS | -0.418 | -3.427 | 2.592 | 0.786 |
| Women | | | | |
| GHQ | 1.041 | 0.127 | 1.954 | 0.026 |
| SF-12 MCS | -1.272 | -2.833 | 0.289 | 0.110 |
| SF-12 PCS | -1.247 | -2.508 | 0.014 | 0.053 |

Table S6 Aggregate average treatment effects on the treated (ATT) from CSDID, estimating the treatment effect of transitioning to Universal Credit (employment-stratified analysis)

|  | Aggregate ATT | 95% CIs | | p-value |
| --- | --- | --- | --- | --- |
| Always Unemployed | | | | |
| GHQ | 2.939 | 0.621 | 5.257 | 0.013 |
| SF-12 MCS | -5.600 | -10.967 | -0.233 | 0.041 |
| SF-12 PCS | -1.727 | -3.702 | 0.247 | 0.086 |
| Always Employed | | | | |
| GHQ | 0.661 | -0.417 | 1.738 | 0.229 |
| SF-12 MCS | -0.922 | -2.530 | 0.685 | 0.261 |
| SF-12 PCS | -0.596 | -2.170 | 0.978 | 0.458 |
